# Supplementary material for: Dehydrogenase versus oxidase function: the interplay between substrate binding and flavin microenvironment
Source: PubMed Central journal article supplement (PMC7617285; doi:10.1021/acscatal.4c05944), 2025-01-02
Supplement: EMS201890-supplement-Supplementary_Information.pdf [file EMS201890-supplement-Supplementary_Information.pdf]

## Supporting Information

# **Dehydrogenase *versus* oxidase function: the interplay between substrate binding and flavin microenvironment**

Teresa Benedetta Guerriere<sup>1</sup>, Alessandro Vancheri<sup>2</sup>, Ilaria Ricotti<sup>2</sup>, Stefano A Serapian<sup>2</sup>, Daniel Eggerichs<sup>3</sup>, Dirk Tischler<sup>3</sup>, Giorgio Colombo<sup>2</sup>, Maria L. Mascotti<sup>4</sup>, Marco W. Fraaije<sup>5\*</sup>, Andrea Mattevi<sup>1\*</sup>

<sup>1</sup>Department of Biology and Biotechnology “Lazzaro Spallanzani”, University of Pavia, Pavia, Italy 27100.

<sup>2</sup> Department of Chemistry, University of Pavia, 27100 Pavia, Italy

<sup>3</sup> Microbial Biotechnology, Ruhr University Bochum, 44780, Bochum, Germany.

<sup>4</sup> IHEM CONICET, Universidad Nacional de Cuyo, Mendoza, Argentina, M5502JMA.

<sup>5</sup> Molecular Enzymology Group, University of Groningen, Groningen, The Netherlands, 9747AG.

\***Correspondence:** M.W.Fraaije@rug.nl; andrea.mattevi@unipv.it

### **Table of Contents**

|                                                                                  |     |
|----------------------------------------------------------------------------------|-----|
| Annotated phylogeny of the VAO/PCMH flavoprotein family (Figure S1)              | S2  |
| Sequence alignment and identities (Figure S2)                                    | S4  |
| Determination of the midpoint redox potential ( $E_m$ ) of VAD (Figure S3)       | S6  |
| Steady-state kinetics experiments on VAD (Figure S4)                             | S7  |
| Steady-state kinetics experiments on nsVAO (Figure S5)                           | S9  |
| Steady-state kinetics experiments on EUGO (Figure S6)                            | S9  |
| Stopped-flow kinetics (Figure S7)                                                | S10 |
| Enzyme-monitored turnover experiment (Figure S8)                                 | S11 |
| The electron density of the flavin and surrounding residues in nsVAO (Figure S9) | S12 |
| Properties of nsVAO T181D mutant (Figure S10)                                    | S12 |
| Data collection and refinement statistics (Table S1)                             | S13 |
| Genetic context (Table S2)                                                       | S16 |
| Steady state kinetic parameters of P151L VAD (Table S3)                          | S18 |
| Primers used for quick change mutagenesis (Table S4)                             | S18 |







**Supplementary Figure 1. Annotated phylogeny of the VAO/PCMH flavoprotein family.** The tree was constructed in RAxML v8.2.10 using 500 rapid bootstraps and automated model selection. The Transfer Bootstrap Expectation/Poster Probability support values are shown at the nodes. Taxonomic groups are colored as follows: Fungi (red), Bacteria (white) and Archaea (blue). The accession codes and species name are given for each sequence included in the dataset. Experimentally characterized enzymes are shown in green. Clades are named as in the main text. The two sequences characterized in this work are marked with yellow stars. The scale bar indicates substitutions per site.

```

PinH -----MLPPGIDSATFQKALSAFANVVGKEW 26
PCMH -----MSEQNNAVLPGKVTQGEFNKAVQKFRALLGDDN 33
EUGH -----MDTTVMPLPAGVSTEQFSKAIAEFRLLLGEDN 31
nsVAO MSGFSIDRRSLLGTGLGASLAAGLGTGASAANPAPLAPGRTKADFAGAMKAFRGVVGAEW 60
VAO -----MSKTQEFRPLTLPKLSLSDFNEFIQDIIRIVGSEN 36
VAD -----MAAPLPEGVSAEAMSSALDRFARIVGADW 29
EPO -----MNFRTLDPGVSAEQFANAISEFSETIGSEY 30
EUGO -----MTRTLPFGVSDERFDAALQFRDVFVGDKW 29
* : : : * .

PinH VFTSDEDLKL-----YRDAYSPYMGEAEERLASAAVAPDTSEQVQEIARIANQYS 76
PCMH VLVESDQLVP-----YNKIMMPVEN--AAHAPSAAVTATTVEQVQGVVVICNEHK 81
EUGH VLATAERVVP-----YTKLLIPTED--DASFMPSGALTPGSVEEVQKILAIICNRYK 80
nsVAO VFGDEEAVVP-----WSKTYIPDP--AHQYKPVGAVCPQSVVEEVQEIIRIANTYK 108
VAO VEVISSKDQIVDGSYMKPTHDPHVMMD--QDYFLASAIIVAPRNVADVQSIVGLANKFS 94
VAD VFT-EDKITP-----YEDPYTISND--ETEHRPYAAVAPASTEVEVQEIIVRVANFEG 77
EPO VRVDEATVSE-----YDDKFPVTDG--DEFKGSAVIWPGSTEDVQVIVIRIANKYG 78
EUGO VLSTADELEA-----FRDPYPVGAA--EANLPSAVVSPESTEQVQDIVRIANEYG 77
* . : . : * : . * .

PinH IPLYTISTGKNLGYGGSAPTYSGSVVLDL-KRMNRIIEVNEKQAYCIVEPGVSYFDMYRY 135
PCMH IPIWTISTGRNFGYGSAAFPVQRQGVLDL-KKMNKIIEIDPEMCYALVEPGVTFGQMYDY 140
EUGH LPVWPISTGRNWGYGSAPATPGQLILD-LKMNKIIEIDVDSCTALLEPGVTYQQLYDH 139
nsVAO QPLWTVSTGKNMGYGMTAPATPGQVLDL-KRMNRIIEVDADLGTCLLEPGVTYQQLKDY 167
VAO FPLWPISIGRNSGYGGAAPRVSGSVVLDMGKNMNRVLEVNVEGAYCVVEPGVTYHDLHNY 154
VAD VPLWVPSRGKNFAYGGAAPVMSGTVVLDL-NRMNRIIEVNEEFGYALVEPGVSYFELYDY 136
EPO IPLHAFSGGRNLGYGGSPLMTGTVLLHLGKRMNRVLEINEKLAYAVVEPGVDYKTYEY 138
EUGO IPLSPVSTGKNNGYGGAAPRLSGSVIVKTGERMNRILEVNEKYGYALLEPGVTYFDLYEY 137
* : . * * : * . * : : . * * : : : . : : * * * : :

PinH LQEKK--SKLWLDVPEPGW-GSMVGNAMDRGAGYTAAQFRNHFDAHCGMEVVLANGEVMR 192
PCMH IQENN--LPVMLSFSAPSAIAGPVGNTMDRGVGYTP--YGEHFMMQCGMEVVLANGDVYR 196
EUGH LKENN--IPLMLDVPITIGPMVGPVGNLDRGVGYTP--YGEHFMMQCGMEVVLANGEILR 195
nsVAO LEEHK--IPLWIDVPTVGPVGPVGNLDRGVGYTP--YGEHFMMQCGMEVCLPDGRMLR 223
VAO LEANLRDKLWLDVPELGG-GSVLGNNAVERGVGYTP--YGDHMMHSGMEVVLANGELLR 211
VAD IQEKG--LKLWIDVPEPGW-GSVVGNALDHGIGYTP--YGDHFAMQCGMEVVLANGEVVR 191
EPO VRDSG--AKLMIDPAELDW-GSMVGNMTEHGVGYTP--YADHSMWRCGMEVVLADGEVLR 193
EUGO LQSHD--SGLMLDCELDLGG-GSVVGNLDRGVGYTP--YGDHFMMQGTGLEVVLPQGEVMR 192
: . : . . : * * * : : * : * * * : * : *

PinH TGMGAMPKS-----KTWAMYKTGFPAIDGIFSQSNFGIVTKMGFWLMP 236
PCMH TGMGGVPGS-----NTWQIFKWGYGPTLDGMFTQANYGICTKMGFWLMP 240
EUGH TGMGSVPA-----KTWQAFKWGYGYPVDGIFTQSNFGVVTMGLWLM 239
nsVAO TGMGSIKGS-----TAWQAFKWGYGYPYLDGLFTQSNFGIVTKMGLWLM 267
VAO TGMGALPDKRPETMGLKPEDQPWSKIAHLFPYGFYIDGLFSQSNMGIIVTKIGIWLMP 271
VAD TGMGAMPGN-----NTWQLFKYGYGYPVDGIFSQSNFGVVTMGIWLMP 235
EPO TGMGGLPGS-----EAWHLYPGQLGPSIEGLFEQSNFGICTRMGMQLMP 237
EUGO TGMGALPGS-----DAWQLFPYGFYGFDPDGMFTQSNLGIIVTKMGIALMQ 236
* * * * : : * * : * * * * : * * * * * *

PinH EPEAFLKGHIHLSQYSMDVPLVELMTELENSK-IFTGYPDINS PAMGTPS-LAGLHEFLA 294
PCMH KPPVFKPFEVIFEDEADIVEIVDALRPLRMSN-TIPNSVVIAS TLWEAGSAHLTRAQYTT 299
EUGH KPPVIKPFMVRYQNESDVVKAIDAMRPLRINQ-LIPNVVLFM HGHYETAI-CKTRAEVTS 297
nsVAO KPPVYKPFMVRHANMEDVPKII EAMRPLRVSN-LVANCNLMMSASYQLAM-FKRRNEIVP 325
VAO NPRGYSYLITLPKDGLKQAVDIIRPLRLGM-ALQNVPTIRHILLDAAV-LGDKRSYSS 329
VAD EPAGYRPLYLITFENEDDIETVTERLPLKVA-GVIQNGATVRS LVLDAAI-TRTKSQYYD 293
EPO TPPEMLSFAYIFENEDDLPAIMETTLPLRIGMAPLQAAPIVRNVTFDAAC-VSKREEWQT 296
EUGO RPPASQSFLITFDKEEDLEQIVDIMLPLRINMAPLQNVPLRNIFMDAAA-VSKRTEWFD 295
* : . * : : * . . . .

```

```

PinH      HGPKEQDPEFMALLGRGAKPEEYAYAKKKGIPFWTCALTFYGPKEKVIRAQWEYAQERFK      354
PCMH      -E-----PGHTPDSVIKQMOKDGTGMGAWNLYAALYGTQEQVDVNWKIVTDVFK      346
EUGH      -D-----PGPISEPDARKVFKELGIGYWNVYFALYGTAEQIAVNEKIVRSIIE      344
nsVAO     -D-----GAPLDEASLKKAASANGLGMWNTYFALYGTAEQTVAGVEPIRATLT      372
VAO       -R-----TEPLSDEELDKIAKQLNLGRWNFYGALYGPPEPIRRVLWETIKDAFS      376
VAD       -G-----DGPIPPSVAKTMMADLDLGMWNFCGALYGPPPVMIDLWTAIRDSFA      340
EPO       -E-----PGPLTDEAKQRMVDELGIGHWIVYGTCTYGPRWQIDKYIEMIRDAYL      343
EUGO     -G-----DGPMPAEAIERMKKDLDLGFWNFYGTLYGPPPLIEMYGYMIKEAFG      342
          .: * : **

PinH      KAFPDAKFAEHEFYKLPPTPEQA--EKVEYPAQFGIPNLRTFAIGARSNWNWNPAPPTHGHA      412
PCMH      KL-GKGRIVTQEEAG-----DTQPFKYRAQLMSGVNLQEFGL---YNWRG--G-GGSM      393
EUGH      PS--GGEIVTEAEAG-----DNILFHHHKQLMCGEMTMEEMNI---YRWRG--AGGGAC      391
nsVAO     AS--GGEVLTAEME-----GNPWFHHHQTLMQGGLNLDEVGL---LRWRG--AGGGLA      419
VAO       AI-PGVKIFYFPEDTP-----ENSVLRVRDKTMQGIPTYDELKW---TDWLP--N-GAHL      423
VAD       DI-PGVKIFYFPEDRR-----HKVDLLHRAETMKGVPKLTEFNF---LNWDG--G-GGHV      388
EPO       QI-PGARFETNETLPLREGDRASELLNARHELNTPVNRHSAAV---FDWFP--N-AGHF      396
EUGO     KI-PGARFFTHEER-----DDRGGHVLQDRHKINNGIPSLDELQL---LDWVP--N-GGHI      391
          .. * . * .

PinH      WFSVPIPRDGAEVLKINEVLGTEARRLGIPLIFAMIVPVPSWERSFTFIIPLFISEDPAQ      472
PCMH      WFAPVSEARGSECKKQAAMAKRVLHXYGLDYVAEFIV---APRDMHHVIDVLYDRTNPEE      450
EUGH      WFAPVAQVKQEAELQVKLAQRVLAHNLDYTAGFAI---GWRDLHHIIDVLYDRNNAEE      448
nsVAO     WFAPVAAARGVEAERQTALAKEIVEKHGFDYTAAYAI---GWRDLHHI IALLFDKADPTQ      476
VAO       FFSPIAKVSGEDAMMQYAVTKKRCQEAGLDFIGTFTV---GMREMHHIVCIVFNKKDLIQ      480
VAD       GFSPVSPITGKDAIKQYNMVSSRVREYGFYDYMGLLAI---GWRDLHHVTVIVYDKTDPDE      445
EPO       FYAPVSAPSGEDAACKQYEDTKRISDDHGIDYLAQFI I---GLREMHHCPLFYDTADPAS      453
EUGO     GFSPVSAPDREAMKQFEMVRNRANEYNKYDAAQFI I---GLREMHVCLFYDTAIPEA      448
          ::: * : . : . . . ::

PinH      NKRSREVFRLHIKVAADNGWGEYRTAPTQADVMDTYSFGDHALLRFHESIKDAVDPKGI      532
PCMH      TKRADACFNELLDEFEKEGYAVYRVNTRFQDRVAQSYGPV---KRKLEHAIKRAVDPNNI      507
EUGH      KKRAYACFDELIEVFAAEGFASYRTNIAFMDKVAKKFGST---NMHVNQI IKKALDPNGI      505
nsVAO     EQKADACYRELVTRFQAQGWASYRTGVNSMDLVAQQYGEV---NRDFNRTLKRAIDPNGI      533
VAO       KRKVQWLMRTLIDDCAANGWGEYRTHLAFMDQIMETYNWNNSSFLRFNEVLKNAVDPNGI      540
VAD       RKKLDELFNILVDEAAEGYGEYRTHIRYMDRIAKTYSWNDNALWKMHETIKDALDPNGI      505
EPO       RKETLDMTRELIRAGAEEGYGIYRAHNVLADQVAETYSFNNHIQRRSHERIKDALDPNGI      513
EUGO     REEILQMTKVLVREAAEAGYGEYRTHNALMDDVMATFNWGDGALLKFHEKIKDALDPNGI      508
          .. * : * : . * : : . . : * * : * : * :

PinH      LSPGRYGIWPKHLRDKHRYKGGDSV      557
PCMH      LAPGRSGIDLNNDF-----      521
EUGH      LAPGKSGIHLPD-----      517
nsVAO     LSPGKSGIHP-----      543
VAO       IAPGKSGVWPSQYSHVTWKL-----      560
VAD       LAPGKSGIWGNRRKA-----      521
EPO       LNPGKSGIWPERLRNK-----      529
EUGO     IAPGKSGIWSQRFRRGQNL-----      526
          : ** : * :

```

|       | PinH   | PCMH   | EUGH   | nsVAO  | VAO    | VAD    | EPO    | EUGO   |
|-------|--------|--------|--------|--------|--------|--------|--------|--------|
| PinH  | 100.00 |        |        |        |        |        |        |        |
| PCMH  | 34.71  | 100.00 |        |        |        |        |        |        |
| EUGH  | 32.02  | 53.79  | 100.00 |        |        |        |        |        |
| nsVAO | 36.17  | 44.94  | 54.86  | 100.00 |        |        |        |        |
| VAO   | 37.96  | 32.43  | 35.21  | 36.36  | 100.00 |        |        |        |
| VAD   | 41.36  | 43.47  | 40.90  | 42.91  | 46.33  | 100.00 |        |        |
| EPO   | 36.85  | 35.47  | 36.45  | 36.27  | 41.84  | 41.92  | 100.00 |        |
| EUGO  | 41.43  | 39.49  | 38.94  | 39.96  | 46.45  | 51.45  | 51.53  | 100.00 |

**Figure S2. Sequence alignment and identities** of pinoresinol hydroxylase from *unclassified Pseudomonas* (PinH), *p*-cresolmethylhydroxylase from *Pseudomonas putida* (PCMH), eugenol hydroxylase from *Pseudomonas* sp, (EUGH), vanillyl alcohol oxidase from *Novosphingobium* sp (nsVAO), vanillyl-alcohol oxidase from *Penicillium simplicissimum* (VAO), vanillyl-alcohol dehydrogenase from *Marinicaulis flavus* (VAD), 4-ethylphenol oxidase from *Gulosibacter chungangensis* (EPO) and eugenol oxidase from *Rhodococcus jostii* (EUGO). The critical residues, listed in **Table 1**, are highlighted

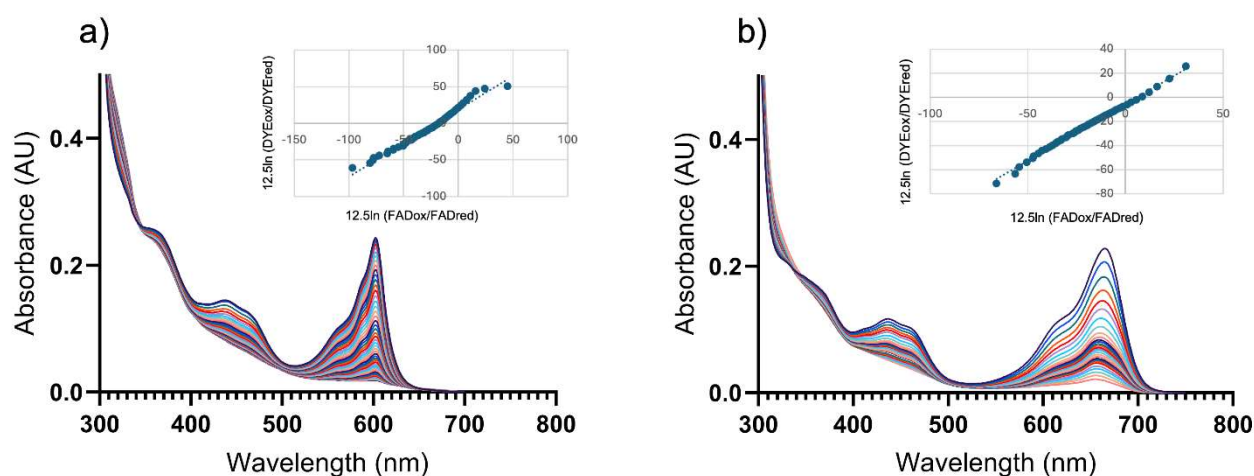

**Figure S3. Determination of the midpoint redox potential ( $E_m$ ) of VAD using the xanthine/xanthine oxidase method.** Spectral changes observed for the determination of the midpoint redox potential of (a) wild type VAD using methylene blue as dye; (b) P151L using thionine acetate as dye. The spectra show the simultaneous reduction of the protein and the dye. They were measured every minute for 60 minutes. The inset shows a plot in which the  $\log[(Ox_{dye})/(Red_{dye})]$  is on the Y-axis, and  $\log[(Ox_{enzyme})/(Red_{enzyme})]$  is on the X-axis. The redox potential of the wild-type enzyme and P151L was found to be  $+82 \pm 2$  mV and  $+6 \pm 1$  mV, respectively.

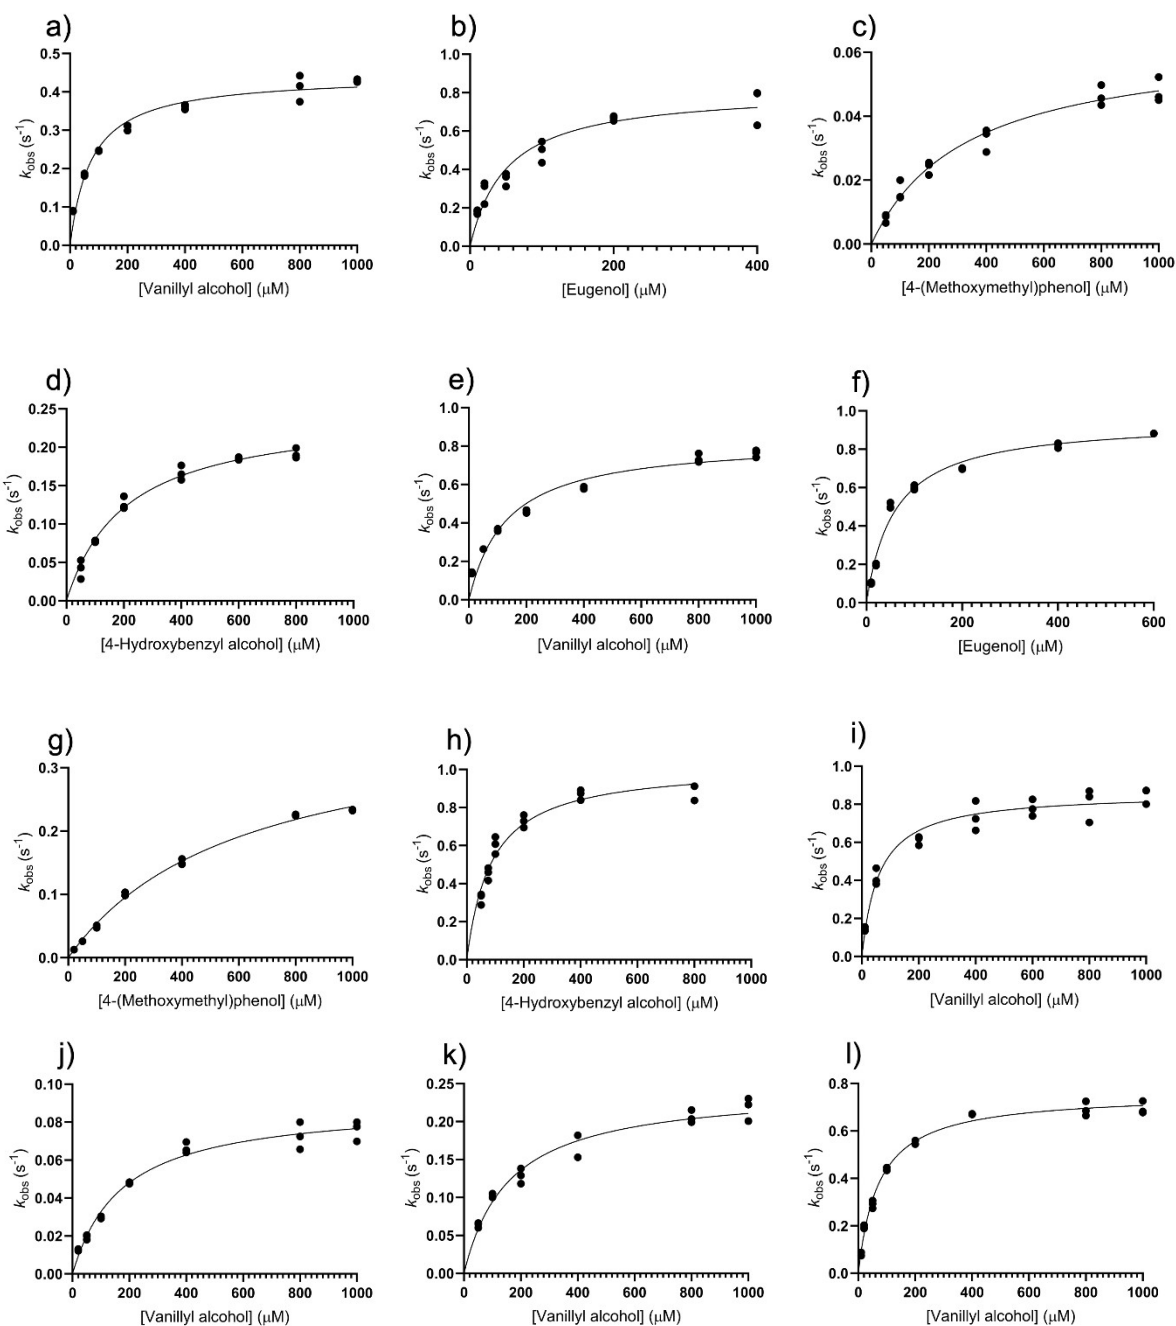

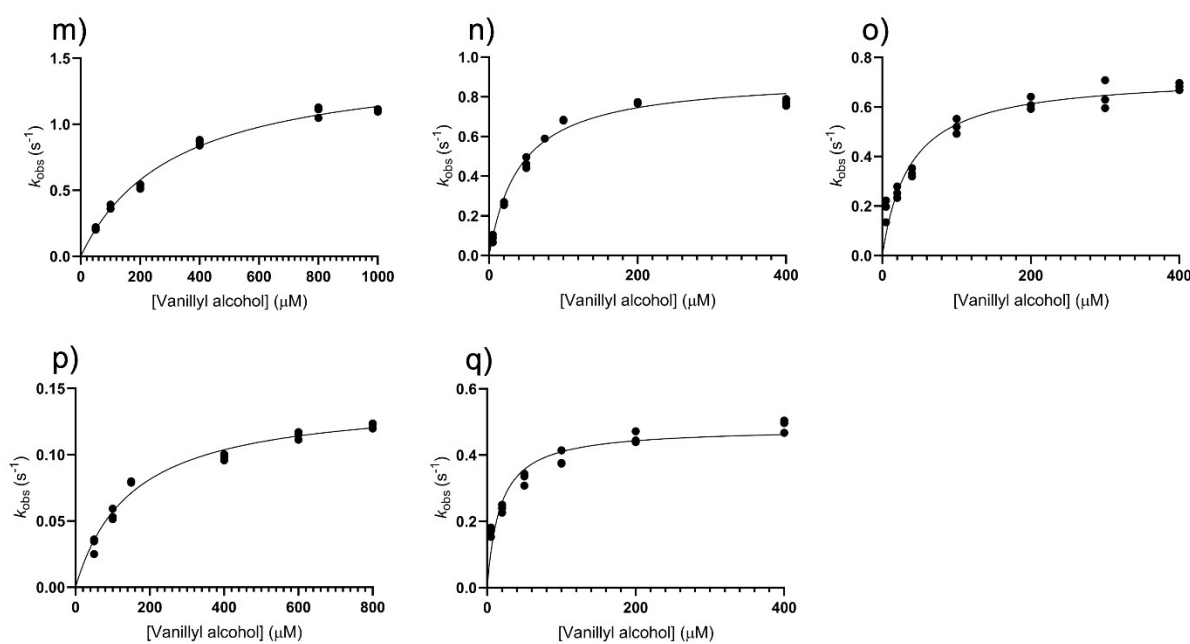

**Figure S4. Steady-state kinetics experiments on VAD.** Wild-type VAD with (a) vanillyl alcohol and 2,6-dichlorophenolindophenol (DCPIP), (b) eugenol and DCPIP, (c) 4-(methoxymethyl)phenol and DCPIP, (d) 4-hydroxybenzyl alcohol and DCPIP. P151L with (e) vanillyl alcohol, (f) eugenol, (g) 4-(methoxymethyl)phenol, (h) 4-hydroxybenzyl alcohol. (i) P151G with vanillyl alcohol. (j) P151V with vanillyl alcohol. (k) P151I with vanillyl alcohol. (l) P151L with vanillyl alcohol and DCPIP. (m) P151G with vanillyl alcohol and DCPIP. (n) P151V with vanillyl alcohol and DCPIP. (o) P151I with vanillyl alcohol and DCPIP. (p) P151N with vanillyl alcohol and DCPIP. (q) P151T with vanillyl alcohol and DCPIP.  $n = 3$  independent experiments, individually plotted as dots.



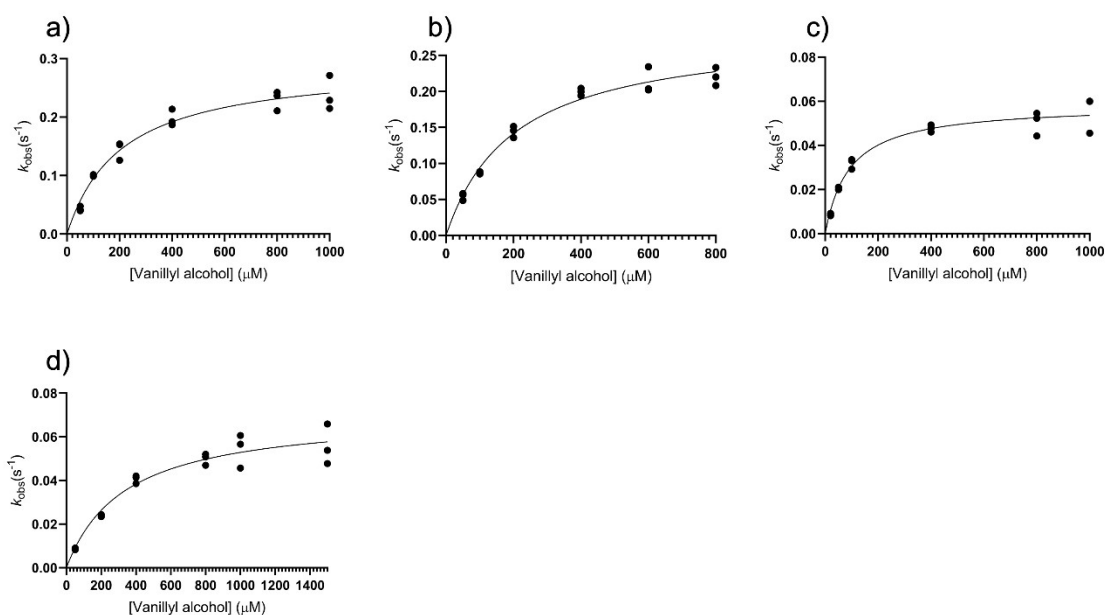

**Figure S5. Steady-state kinetics experiments on nsVAO.** (a) Wild type enzyme with vanillyl alcohol, (b) T181D with vanillyl alcohol, (c) wild type with vanillyl alcohol and cytochrome c. (d) T181D with vanillyl alcohol and cytochrome c.  $n = 3$  independent experiments, individually plotted as dots.

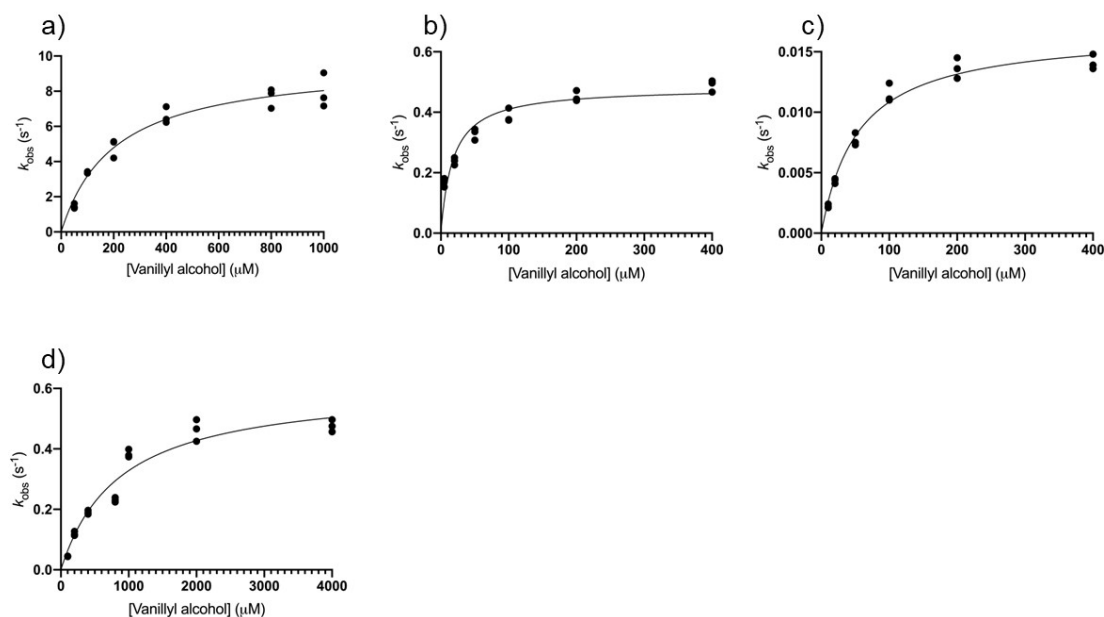

**Figure S6. Steady-state kinetics experiments on EUGO from *Rhodococcus jostii* RHA1.** (a) Wild type enzyme with vanillyl alcohol, (b) wild type with vanillyl alcohol and DCPIP, (c) EUGO L152P with vanillyl alcohol, (d) EUGO L152P with vanillyl alcohol and DCPIP.

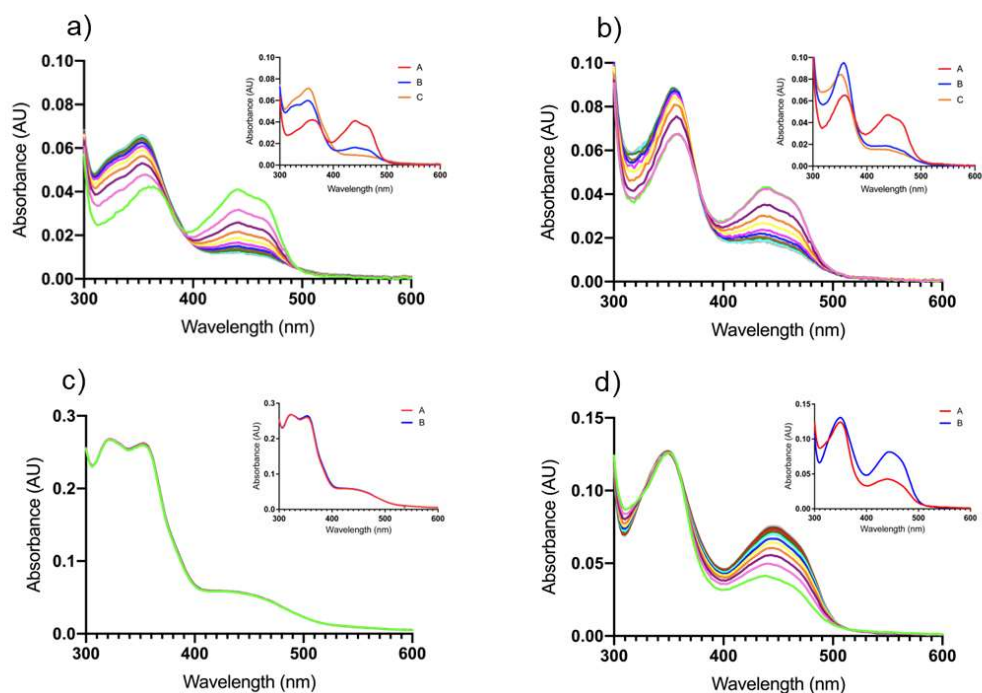

**Figure S7. Spectral changes observed through stopped-flow apparatus.** (a) Anaerobic mixing of wild-type VAD (5  $\mu\text{M}$ ) with vanillyl alcohol (400  $\mu\text{M}$ ) and (b) P151L (5  $\mu\text{M}$ ) with vanillyl alcohol (1000  $\mu\text{M}$ ). Spectral scans are shown from 0 to 10 s with intervals of 1 s for the wild-type enzyme, and from 0 to 20 ms with intervals of 2 ms for P151L. The data were fit with two exponential functions ( $A \rightarrow B$ ,  $B \rightarrow C$ ). The insets show the deconvolution of the spectral scans for  $A$ ,  $B$  and  $C$ . In the  $B$  state, the enzyme is almost completely reduced and the  $k_{\text{red}}$  values listed in **Table 3** refer to the  $A \rightarrow B$  conversion rates. (c) Vanillyl alcohol-reduced wild-type VAD (20  $\mu\text{M}$ ) upon mixing with oxygen and (d) vanillyl alcohol-reduced P151L (10  $\mu\text{M}$ ) upon mixing with oxygen. Spectral scans are shown from 0 to 10 s with intervals of 1 s for the wild-type enzyme, and from 0 to 2 s with intervals of 0,2 s for P151L. The data were fit with one exponential function ( $A \rightarrow B$ ) as listed in **Table 4**. The insets show the deconvolution of the spectral scans for  $A$  and  $B$ .

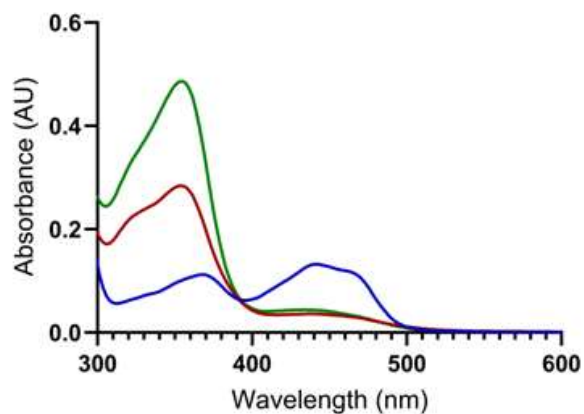

**Figure S8. Enzyme-monitored turnover experiment.** Spectral changes observed upon aerobic mixing wild type and P151L VAD (12  $\mu$ M) with 2.5 mM vanillyl alcohol. The spectrum of the initial oxidized wild-type enzyme is in blue. The spectrum of P151L would be indistinguishable and is not shown for clarity. The spectra of the wild-type and P151L proteins after 10 s incubation are in red and blue, respectively.



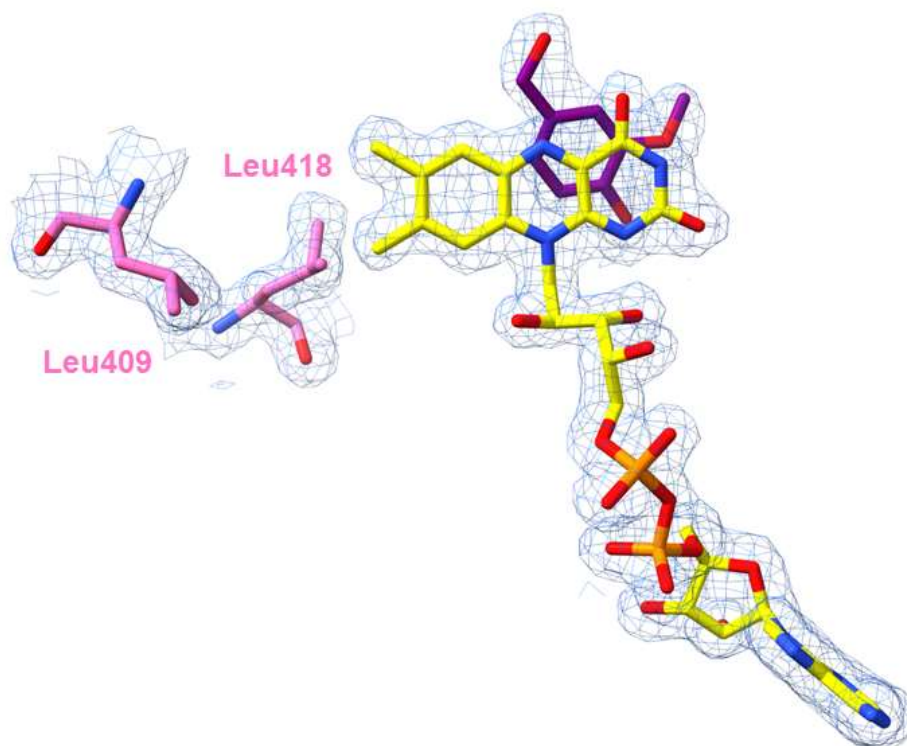

**Figure S9.** The electron density of the flavin and surrounding residues in nsVAO. The weighted 2Fo-Fc map is contoured at 1.2  $\sigma$  level.

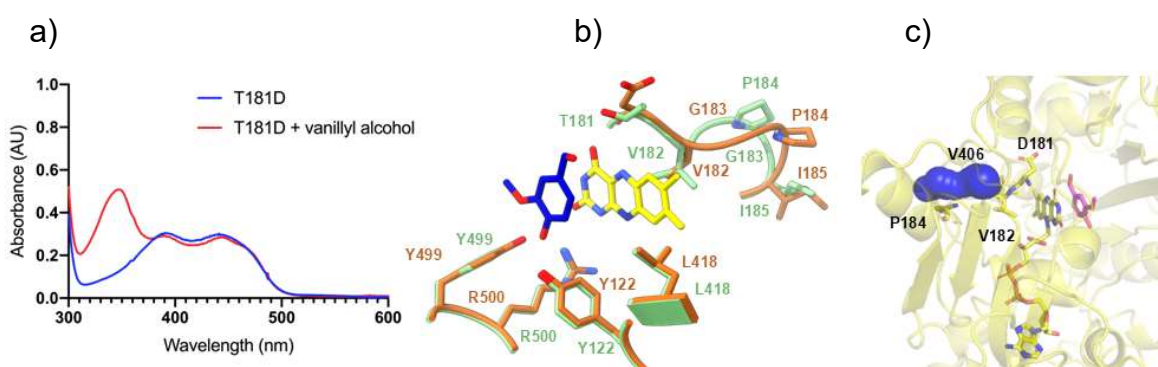

**Figure S10. Properties of nsVAO T181D mutant.** (a) Incubation of T181D (30  $\mu\text{M}$ ) with vanillyl alcohol (45  $\mu\text{M}$ ). The spectra before substrate addition and after 30-minute incubation are in blue and red, respectively. Vanillin, formed upon vanillyl alcohol oxidation, has an absorbance peak at 340 nm ( $\epsilon=14000 \text{ M}^{-1}\cdot\text{cm}^{-1}$ ). (b) Structural comparison between wild type (green carbons) and T181D (dark orange carbons) nsVAOs. (c) Accessibility of the flavin N5-C4a locus. Compared to the wild-type nsVAO (**Figure 8c**), there is a narrowing of the tunnel leading to the flavin re side, as revealed by the mutant's crystal structure

**Table S1a. Data collection and refinement statistics of VAD: wild type, P151L, P151I and VAD P151V.**

|                                          | Wild Type                | P151L                            | P151I                                         | P151V                                         |
|------------------------------------------|--------------------------|----------------------------------|-----------------------------------------------|-----------------------------------------------|
| PDB code                                 | 8S7P                     | 8S7U                             | 8S7Q                                          | 8S7W                                          |
| Space group                              | C222 <sub>1</sub>        | P4 <sub>1</sub> 2 <sub>1</sub> 2 | P2 <sub>1</sub> 2 <sub>1</sub> 2 <sub>1</sub> | P2 <sub>1</sub> 2 <sub>1</sub> 2 <sub>1</sub> |
| Unit cell axes (Å)                       | 90.14, 143.22,<br>287.75 | 138.495, 138.495,<br>180.947     | 100.443, 113.338,<br>130.168                  | 100.62, 114.64,<br>130.71                     |
| Unit cell angles (°)                     | 90, 90, 90               | 90, 90, 90                       | 90, 90, 90                                    | 90, 90, 90                                    |
| Resolution (Å)                           | 67.49–2.35               | 47.31–1.80                       | 52.01–2.40                                    | 49.86–2.10                                    |
| <i>R</i> <sub>merge</sub>                | 0.166 (3.295)            | 0.146 (2.885)                    | 0.198 (1.032)                                 | 0.159 (1.132)                                 |
| CC <sub>1/2</sub>                        | 0.998 (0.488)            | 0.999 (0.390)                    | 0.994 (0.664)                                 | 0.989 (0.394)                                 |
| Completeness (%)                         | 100.0 (99.6)             | 99.7 (100.0)                     | 99.7 (96.9)                                   | 98.8 (99.1)                                   |
| Unique reflections                       | 77772 (4521)             | 161652 (7961)                    | 58641 (4368)                                  | 87358 (4434)                                  |
| Multiplicity                             | 21.3 (16.1)              | 13.5 (13.4)                      | 8.8 (7.8)                                     | 4.3 (4.1)                                     |
| Overall <i>I</i> / $\sigma$ ( <i>I</i> ) | 12.6 (0.8)               | 11.8 (0.9)                       | 9.1 (2.1)                                     | 8.4 (1.6)                                     |
| Protein residues                         | 1556                     | 1038                             | 1038                                          | 1038                                          |
| FAD molecules                            | 3                        | 2                                | 2                                             | 2                                             |
| Ligand                                   | -                        | -                                | -                                             | -                                             |
| Water molecules                          | 48                       | 718                              | 358                                           | 589                                           |
| <i>R</i> / <i>R</i> <sub>free</sub> (%)  | 22.8 /27.9               | 15.5/18.0                        | 17.8/23.1                                     | 17.2/20.9                                     |
| Rms bond length                          | 0.001                    | 0.001                            | 0.001                                         | 0.001                                         |
| Rms bond angle                           | 0.518                    | 1.497                            | 0.488                                         | 1.343                                         |
| Ramachandran outliers (%)                | 0.2                      | 0.1                              | 0.2                                           | 0.0                                           |
| Average B-factor                         | 57.0                     | 30.0                             | 34.0                                          | 28.0                                          |

**Table S1b. Data collection and refinement statistics of VAD: P151L, P151T, P151N and P151G.**

|                                          | <b>P151L with<br/>eugenol</b>    | <b>P151T</b>              | <b>P151N</b>              | <b>P151G</b>              |
|------------------------------------------|----------------------------------|---------------------------|---------------------------|---------------------------|
| PDB code                                 | 8S7N                             | 8S7R                      | 8S7T                      | 8S7S                      |
| Space group                              | P4 <sub>1</sub> 2 <sub>1</sub> 2 | C222 <sub>1</sub>         | C222 <sub>1</sub>         | C222 <sub>1</sub>         |
| Unit cell axes (Å)                       | 139.02, 139.02,<br>181.06        | 91.949 144.451<br>286.785 | 89.525 142.426<br>286.436 | 90.804 144.145<br>289.452 |
| Unit cell angles (°)                     | 90, 90, 90                       | 90, 90, 90                | 90, 90, 90                | 90, 90, 90                |
| Resolution (Å)                           | 49.20– 1.80                      | 143.39– 1.90              | 143.22–2.10               | 64.60 – 2.50              |
| <i>R</i> <sub>merge</sub>                | 0.194 (3.735)                    | 0.066 (1.253)             | 0.139 (2.349)             | 0.202 (3.274)             |
| CC <sub>1/2</sub>                        | 0.998 (0.388)                    | 0.991 (0.423)             | 0.999 (0.553)             | 0.997 (0.605)             |
| Completeness (%)                         | 100.0 (100.0)                    | 97.8 (98.7)               | 100.0 (100.0)             | 100.0 (100.0)             |
| Unique reflections                       | 163464 (8025)                    | 146187 (7204)             | 106762 (5214)             | 66056 (4381)              |
| Multiplicity                             | 13.5 (13.3)                      | 3.7 (3.8)                 | 20.1 (20.7)               | 22.8 (23.6)               |
| Overall <i>I</i> / $\sigma$ ( <i>I</i> ) | 11.0 (0.9)                       | 9.2 (1.1)                 | 14.3 (1.5)                | 12.5 (1.2)                |
| Protein residues                         | 1038                             | 1554                      | 1553                      | 1554                      |
| FAD molecules                            | 2                                | 3                         | 3                         | 3                         |
| Ligand molecules                         | 2                                | -                         | -                         | -                         |
| Water molecules                          | 917                              | 468                       | 292                       | 242                       |
| <i>R</i> / <i>R</i> <sub>free</sub> (%)  | 15.8 /18.4                       | 19.4/ 23.5                | 18.4/23.2                 | 19.2/25.2                 |
| Rms bond length                          | 0.001                            | 0.001                     | 0.001                     | 0.001                     |
| Rms bond angle                           | 1.485                            | 0.456                     | 0.463                     | 0.506                     |
| Ramachandran outliers (%)                | 0.0                              | 0.0                       | 0.1                       | 0.2                       |
| Average B-factor                         | 27.0                             | 46.0                      | 50.0                      | 57.0                      |



**Table S1c. Data collection and refinement statistics of nsVAO.**

|                                          | <b>nsVAO with<br/>vanillyl alcohol</b> | <b>T181D with<br/>vanillin</b>  |
|------------------------------------------|----------------------------------------|---------------------------------|
| PDB code                                 | 9FFK                                   | 9FGE                            |
| Space group                              | P22 <sub>1</sub> 2 <sub>1</sub>        | P22 <sub>1</sub> 2 <sub>1</sub> |
| Unit cell axes (Å)                       | 90.84, 96.77,<br>129.11                | 91.33 97.82<br>129.61           |
| Unit cell angles (°)                     | 90, 90, 90                             | 90, 90, 90                      |
| Resolution (Å)                           | 90.85 – 1.70                           | 78.20 – 1.60                    |
| <i>R</i> <sub>merge</sub>                | 0.162 (2.466)                          | 0.15 (1.476)                    |
| CC <sub>1/2</sub>                        | 0.999 (0.707)                          | 0.998 (0.793)                   |
| Completeness (%)                         | 99.7 (99.7)                            | 99.6 (99.3)                     |
| Unique reflections                       | 125029 (6098)                          | 152440 (7444)                   |
| Multiplicity                             | 20.0 (18.6)                            | 9.3 (9.1)                       |
| Overall <i>I</i> / $\sigma$ ( <i>I</i> ) | 10.1 (1.3)                             | 8.8 (1.6)                       |
| Protein residues                         | 1002                                   | 1002                            |
| FAD molecules                            | 2                                      | 2                               |
| Ligand molecules                         | 2                                      | 2                               |
| Water molecules                          | 558                                    | 772                             |
| <i>R</i> / <i>R</i> <sub>free</sub> (%)  | 22.3 /25.4                             | 17.5/20.4                       |
| Rms bond length                          | 0.002                                  | 0.001                           |
| Rms bond angle                           | 1.449                                  | 0.579                           |
| Ramachandran outliers (%)                | 1                                      | 0.2                             |
| Average B-factor                         | 27.0                                   | 18.0                            |

**Table S2. Genetic context of VAD from *Marinicaulis flavus* and VAO from *Novosphingobium* sp.**

|                  | <b>GenBank Accession Code</b> | <b>Annotation</b>                                      |
|------------------|-------------------------------|--------------------------------------------------------|
| Upstream genes   | WP_104830656.1                | UbiD family decarboxylase                              |
|                  | WP_104830657.1                | Hypothetical protein                                   |
|                  | WP_104830658.1                | Pilus assembly protein<br>TadG-related protein         |
|                  | WP_104830659.1                | Pilus assembly protein                                 |
|                  | WP_104830660.1                | Pilus assembly protein                                 |
|                  | WP_207764815.1                | Putative cytochrome c                                  |
| VAD              | WP_104830661.1                | FAD-binding oxidoreductase                             |
| Downstream genes | WP_133162311.1                | Hypothetical protein                                   |
|                  | WP_104830663.1                | ATPase                                                 |
|                  | WP_104830664.1                | Hypothetical protein                                   |
|                  | WP_104830665.1                | Hypothetical protein                                   |
|                  | WP_104830666.1                | Glutathione S-transferase<br>family protein            |
|                  | WP_104830667.1                | Glutathione-dependent<br>disulfide-bond oxidoreductase |

|                  | <b>GenBank Accession Code</b> | <b>Annotation</b>                                     |
|------------------|-------------------------------|-------------------------------------------------------|
| Upstream genes   | WP_124809343.1                | Glycogen/starch/alpha-glucan phosphorylase            |
|                  | WP_124809344.1                | 1,4-alpha-glucan branching protein GlgB               |
|                  | WP_124809345.1                | Glucose-1-phosphate adenylyltransferase               |
|                  | WP_124809346.1                | Glycogen synthase GlgA                                |
|                  | WP_124809347.1                | Alpha-D-glucose phosphate-specific phosphoglucomutase |
|                  | WP_223806624.1                | Glycogen debranching protein GlgX                     |
| nsVAO            | WP_124809348.1                | FAD-binding oxidoreductase                            |
| Downstream genes | WP_124809349.1                | Putative cytochrome c                                 |
|                  | WP_190287233.1                | TetR/AcrR family transcriptional regulator            |
|                  | WP_124809351.1                | Alpha/beta hydrolase                                  |
|                  | WP_124809352.1                | DUF2334 domain-containing protein                     |
|                  | WP_223806625.1                | Hypothetical protein                                  |
|                  | WP_124809353.1                | Glycosyltransferase                                   |



**Table S3. Steady state kinetic parameters of P151L VAD**

| VAD   | Substrate               | O <sub>2</sub>                  |                        |                                                      |
|-------|-------------------------|---------------------------------|------------------------|------------------------------------------------------|
|       |                         | $k_{cat}$<br>(s <sup>-1</sup> ) | K <sub>M</sub><br>(μM) | $k_{cat}/K_M$<br>(s <sup>-1</sup> mM <sup>-1</sup> ) |
| P151L | Vanillyl alcohol        | 0.83±0.05                       | 131.9±30.4             | 6                                                    |
| P151L | Eugenol                 | 0.92±0.04                       | 55±8.8                 | 17                                                   |
| P151L | 4-Hydroxy benzylalcohol | 1.02±0.03                       | 86.74±9.1              | 12                                                   |
| P151L | 4-Methoxy methylphenol  | 0.38±0.02                       | 600±70                 | 0.6                                                  |

Measured at 25 °C in 50 mM potassium phosphate pH 7.5, 150 mM NaCl. Data are shown as average values ± standard deviation. n = 3 independent experiments. No activity was detected on *p*-cresol.

**Supplementary Table 4. Primers used for quick change mutagenesis**

| Primer name   | Sequence                           |
|---------------|------------------------------------|
| VAD_P151Lfw   | gtgccggacctgggctggggtagtgtggtcgg   |
| VAD_P15Lrv    | accccagcccagggtccggcacatcgatccata  |
| VAD_P151Vfw   | ccggacgtgggctggggtagtgtg           |
| VAD_P151Vrv   | ccagcccacgtccggcacatcgatc          |
| VAD_P151Ifw   | ccggacattggctggggtagtgtg           |
| VAD_P151Irv   | ccagccaatgtccggcacatcgatc          |
| VAD_P151Gfd   | gtgccggacggcggctggggtagtgtggtcgg   |
| VAD_P151Grv   | accccagccgctccggcacatcgatccata     |
| VAD_P151Nfw   | gtgccggacaacggctggggtagtgtggtcgg   |
| VAD_P151Nrv   | accccagccttgggtccggcacatcgatccata  |
| VAD_P151Tfw   | ccggacaccggctggggtagtgtg           |
| VAD_P151Trv   | ccagccggtgtccggcacatcgatc          |
| nsVAO_T181Dfw | acgtcccagatgtcgcccattgcattccag     |
| nsVAO_T181Drv | cgggccgacatctgggacgtcaatccaaagggga |

|              |                       |
|--------------|-----------------------|
| EUGO_L152Pfw | gaccCGGGatGGGGcagcgtg |
| EUGO_L152Prv | ccatCCCGGgtCGGGacagtc |
